# Supplementary material for: Covalent triazine framework@silica core–shell spheres decorated with ultrafine platinum nanoparticles: a robust catalyst for selective aqueous phase hydrogenation of butane-2,3-dione and pyruvic acid
Source: Royal Society of Chemistry journal article supplement (doi:10.1039/d5dt02604k), 2026-01-01
Supplement: d5dt02604k1.pdf [file d5dt02604k1.pdf]

# Supporting Information

## **Covalent triazine framework @ silica core-shell spheres decorated with ultrafine platinum nanoparticles: a robust catalyst for selective aqueous phase hydrogenation of butane-2,3-dione and pyruvic acid**

Claudio Evangelisti,<sup>\*a</sup> Werner Oberhauser,<sup>\*b</sup> Francesco Poggialini,<sup>a</sup> Emanuela Pitzalis,<sup>a</sup> Xuan Trung Nguyen,<sup>a</sup> Esther Punzi,<sup>a</sup> Serena Coiai,<sup>a</sup> Nicola Scotti,<sup>c</sup> Lorenzo Poggini,<sup>b,d</sup> and Alessandro Mandoli<sup>e</sup>

*<sup>a</sup> Institute of Chemistry of OrganoMetallic Compounds, ICCOM-CNR, Via G. Moruzzi 1, 56124 Pisa, Italy.*

*<sup>b</sup> Institute of Chemistry of OrganoMetallic Compounds, ICCOM-CNR, Via Madonna del Piano 10, 50019 Sesto Fiorentino, (FI), Italy.*

*<sup>c</sup> Institute of Science and Chemical Technologies “Giulio Natta”, SCITEC-CNR, Via C. Golgi 19, 20133 Milano, Italy.*

*<sup>d</sup> Department of Chemistry “U. Schiff” - DICUS – and INSTM Research Unit, University of Florence, Via della Lastruccia 3-13, 50019 Sesto Fiorentino (FI), Italy.*

*<sup>e</sup> Department of Chemistry and Industrial Chemistry, University of Pisa, Via G. Moruzzi 13, 56124 Pisa, Italy.*

## 1. Synthesis

### 1.1. Synthesis of terephthalamidine dihydrochloride

According to a previously reported synthesis [see ref. 27 of the manuscript], a 100 mL 3-neck round bottom flask equipped with a magnetic stir bar and dropping funnel was charged under Ar with 0.641 g of terephthalonitrile (5.00 mmol, Merck 98.0%) and 20 mL of anhydrous THF. The flask was placed in an ice-water bath and 20 mL of 0.5 M  $\text{LiN}(\text{SiMe}_3)_2$  in 2-methyltetrahydrofuran (26 mmol, 5.2 equiv.) was added dropwise over 30 min. The bath was removed, obtaining a clear orange solution that was left stirring for 3 hours at 25°C before being cooled at 0°C and then quenched by careful addition of 20 mL of 6 M HCl-EtOH. After 18 h the suspension was filtered and washed with diethyl ether, obtaining 1.5 mg of crude terephthalamidine dihydrochloride.

The product thus obtained was purified by recrystallization from  $\text{H}_2\text{O}$ -EtOH (1:5). The crystals were filtered under vacuum on a sintered glass frit and dried at reduced pressure, to give 0.823 g (3.50 mmol, 70 % yield) of the title compound.

$^1\text{H}$  NMR (400 MHz,  $\text{D}_2\text{O}$ ):  $\delta$  (ppm) = 7.82 (s, 4H, aromatic H), 4.64 (s, 8H, NH).  $^{13}\text{C}\{^1\text{H}\}$  NMR (100 MHz,  $\text{D}_2\text{O}$ ):  $\delta$  (ppm) = 165.86, 132.9, 128.7.

## 2. Figures

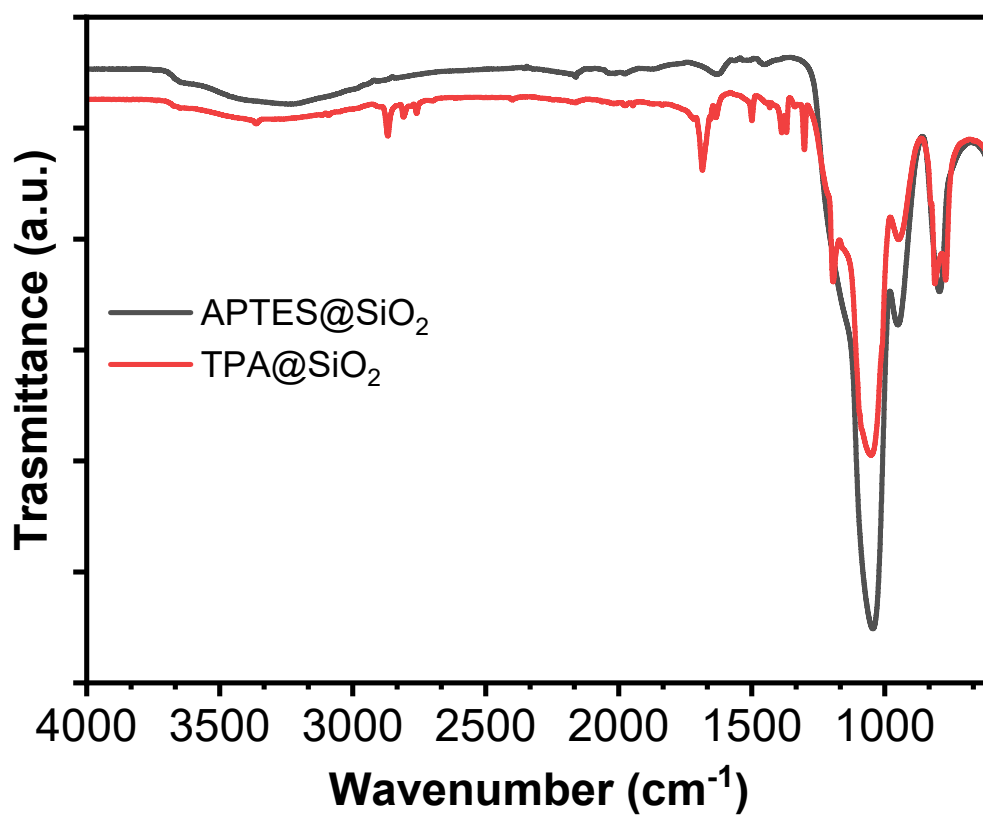

**Fig. S1.** FT-IR spectra of APTES@SiO<sub>2</sub> (grey) and TPA@SiO<sub>2</sub> (red).

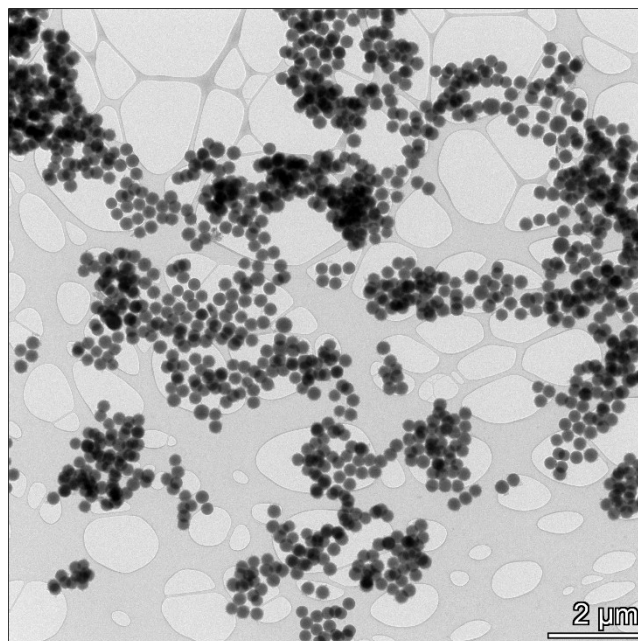

**Fig. S2.** Representative low magnification TEM micrograph of CTF@SiO<sub>2</sub>.

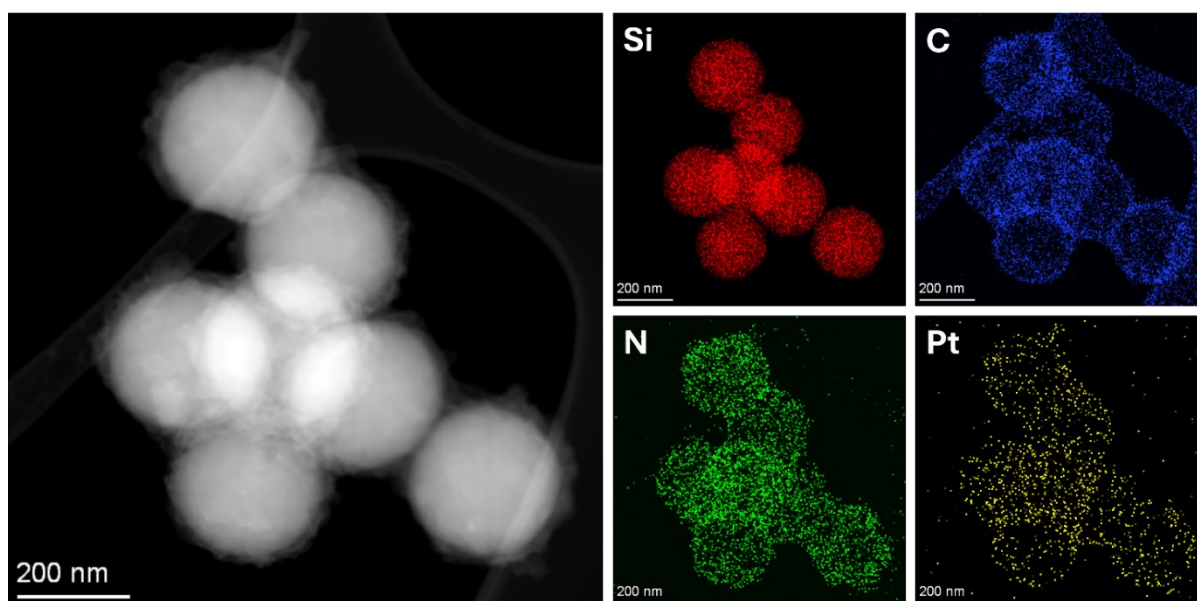

**Fig. S3.** HAADF-STEM/EDS element map of Pt/CTF@SiO<sub>2</sub>.

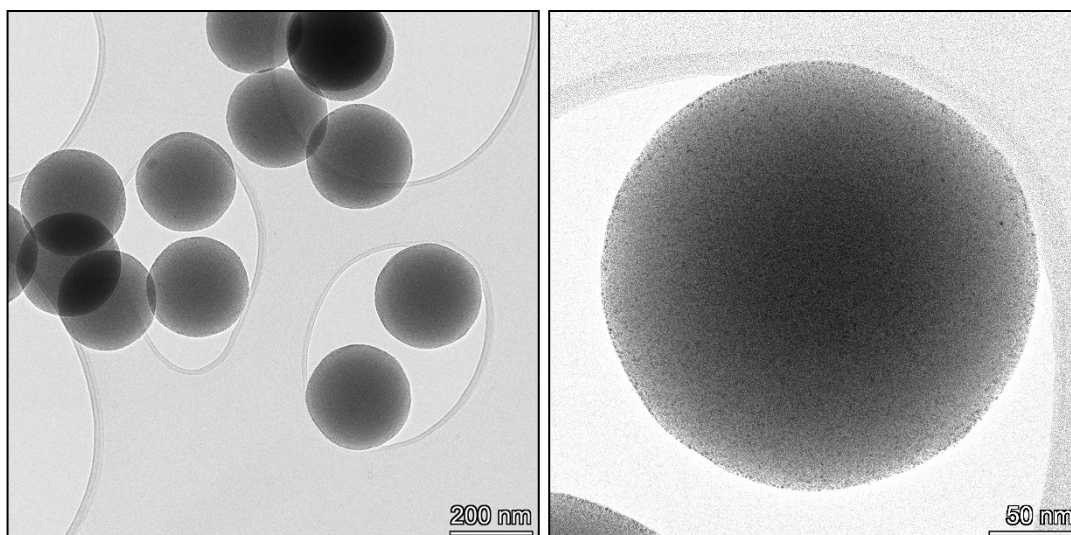

**Fig. S4.** Representative TEM micrographs of Pt/SiO<sub>2</sub>.

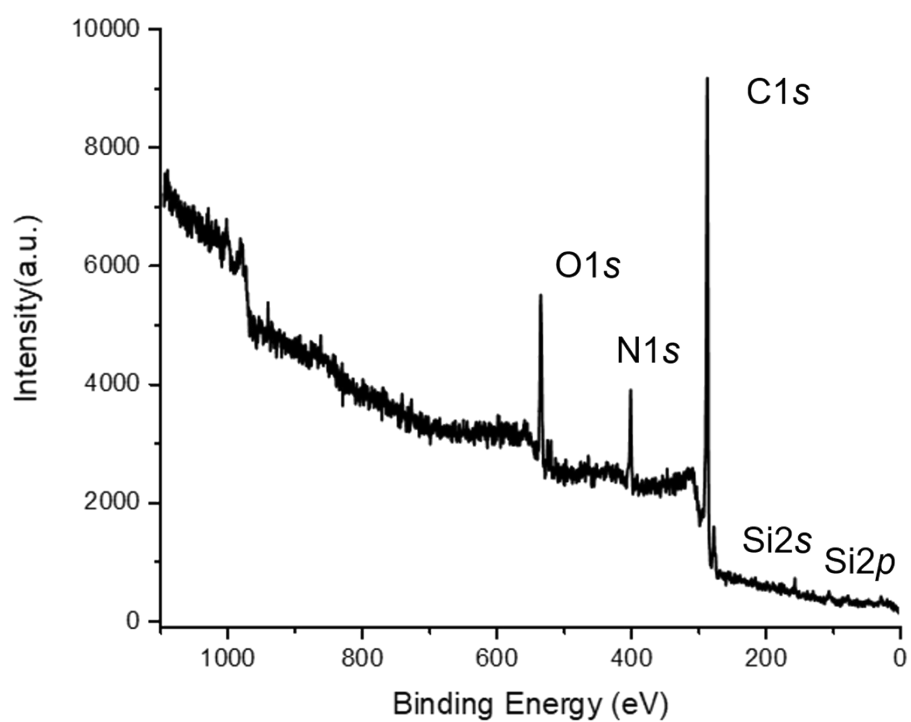

**Fig. S5.** Survey XPS spectrum for CTF@SiO<sub>2</sub>.

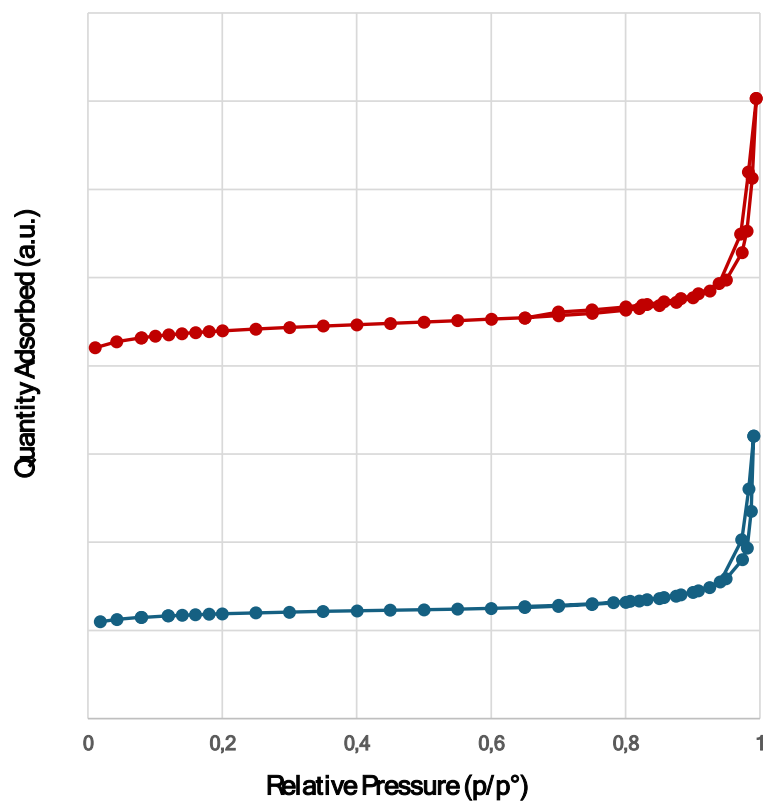

**Fig S6.** Nitrogen physisorption isotherms for SiO<sub>2</sub> (upper) and CTF@SiO<sub>2</sub> (lower).

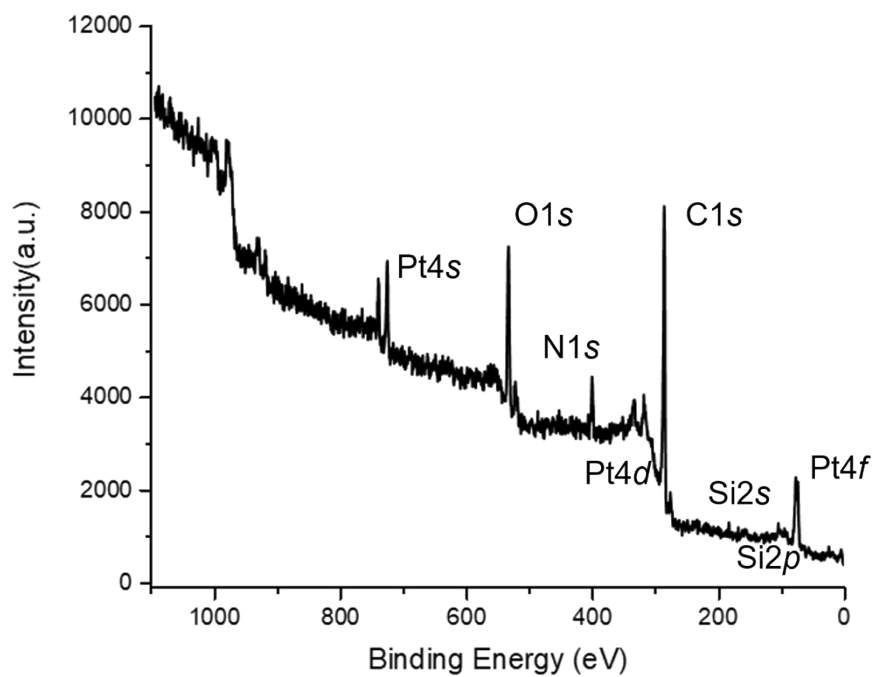

**Fig. S7.** Survey XPS spectrum for 1.

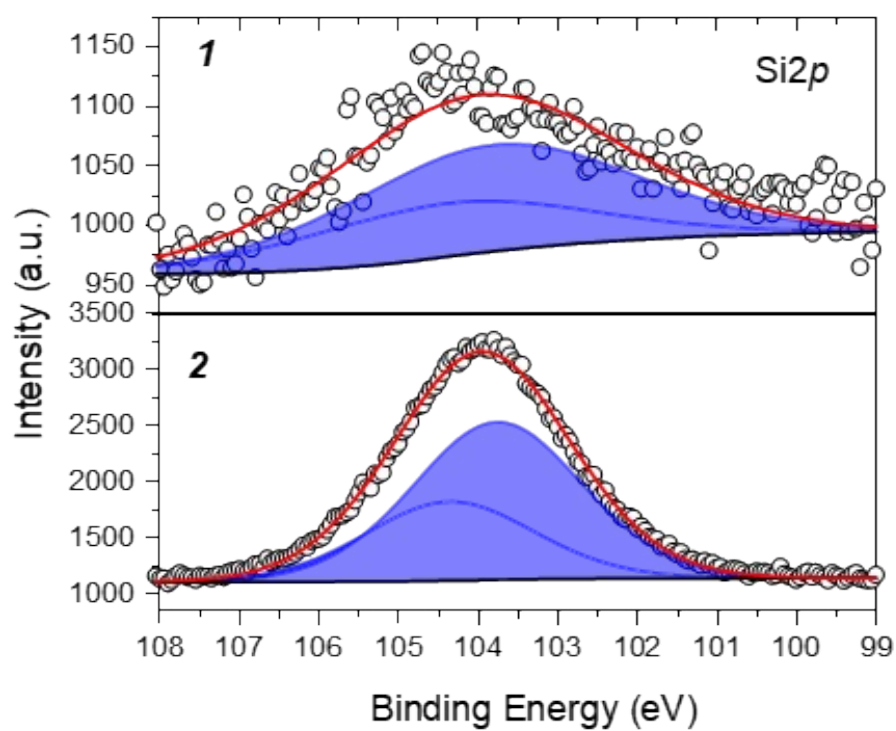

**Fig. S8.** Si2*p* XPS spectra for **1** and **2**.

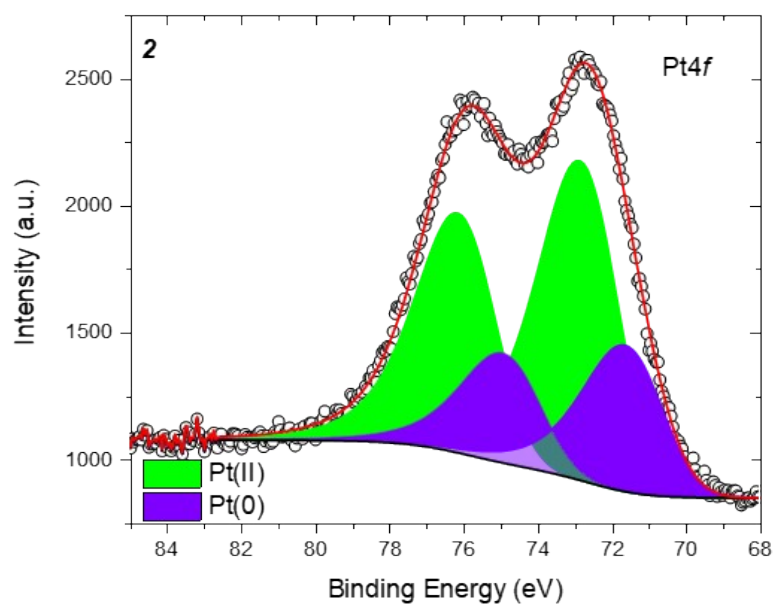

**Fig. S9.** Pt4*f* XPS spectrum for **2**.

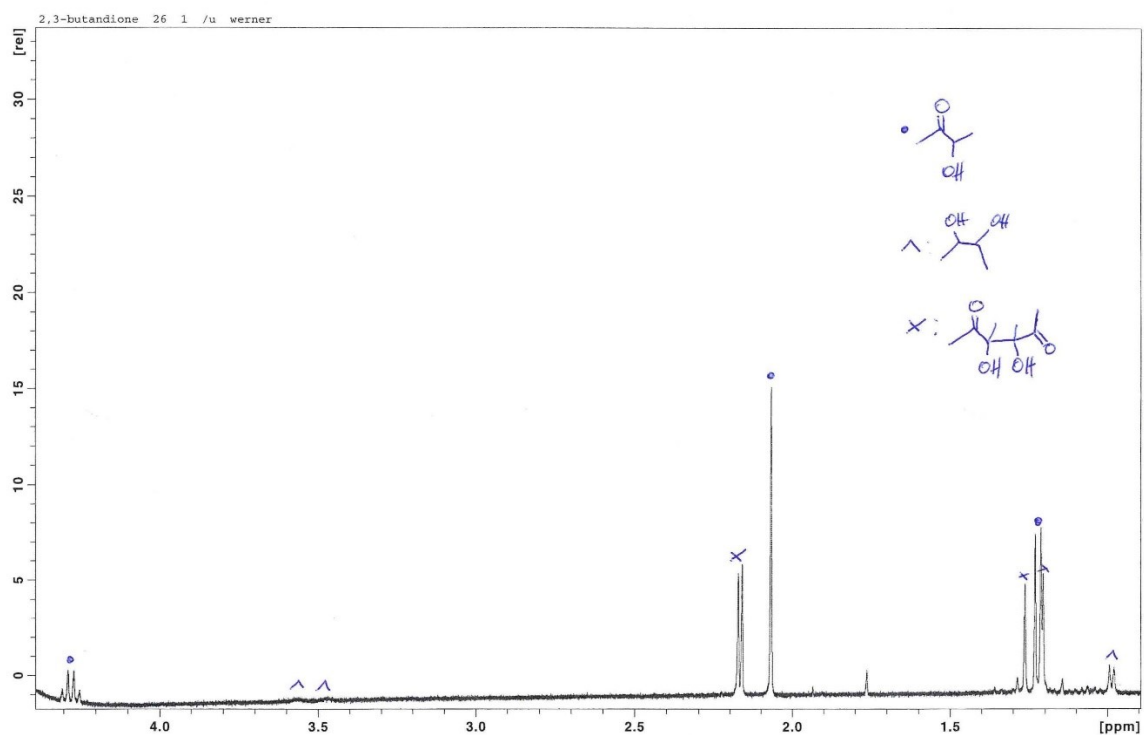

**Fig. S10.**  $^1\text{H}$  NMR spectrum acquired with an Evans tube ( $\text{D}_2\text{O}$ ) for the **1**-catalyzed 2,3-BDO hydrogenation carried out at 85  $^\circ\text{C}$  for half an hour.





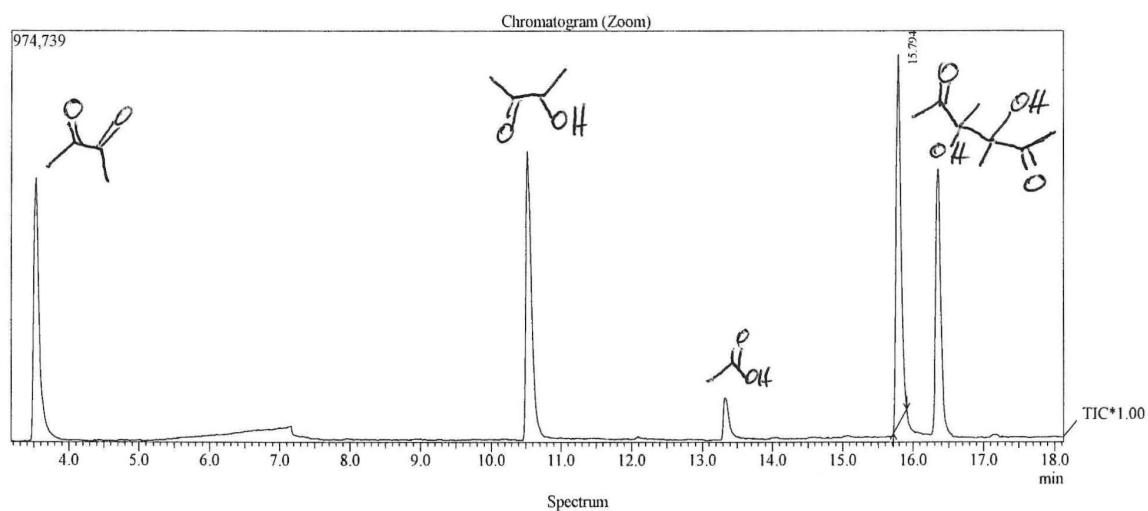

Line#:1 R.Time:15.792(Scan#:1764)  
 MassPeaks:362  
 RawMode:Single 15.792(1764) BasePeak:43.00(399602)  
 BG Mode:None Group 1 - Event 1 Scan

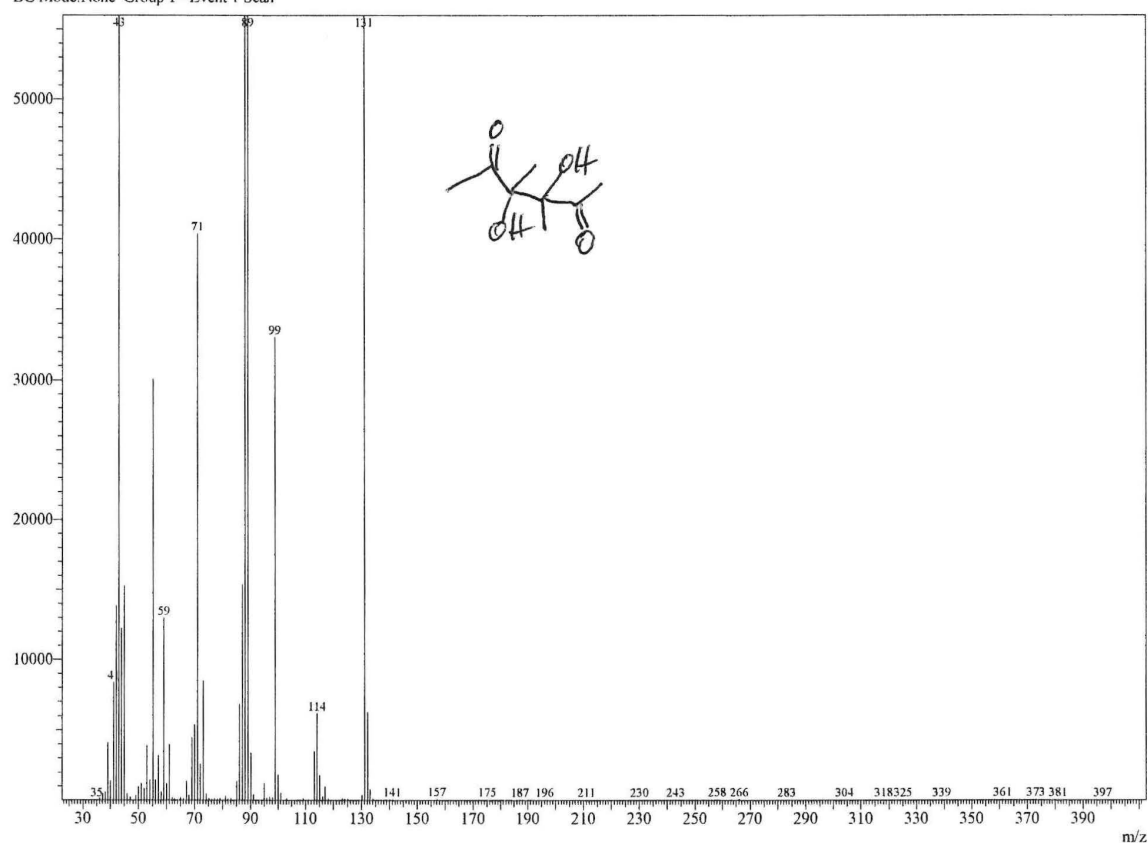

**Fig. S12.** GC trace for the **1**-catalyzed 2,3-BDO hydrogenation carried out at 85 °C for 3 h (top) and MS spectrum for 3,4-dihydroxy-3,4-dimethylhexa-2,5-dione (bottom).

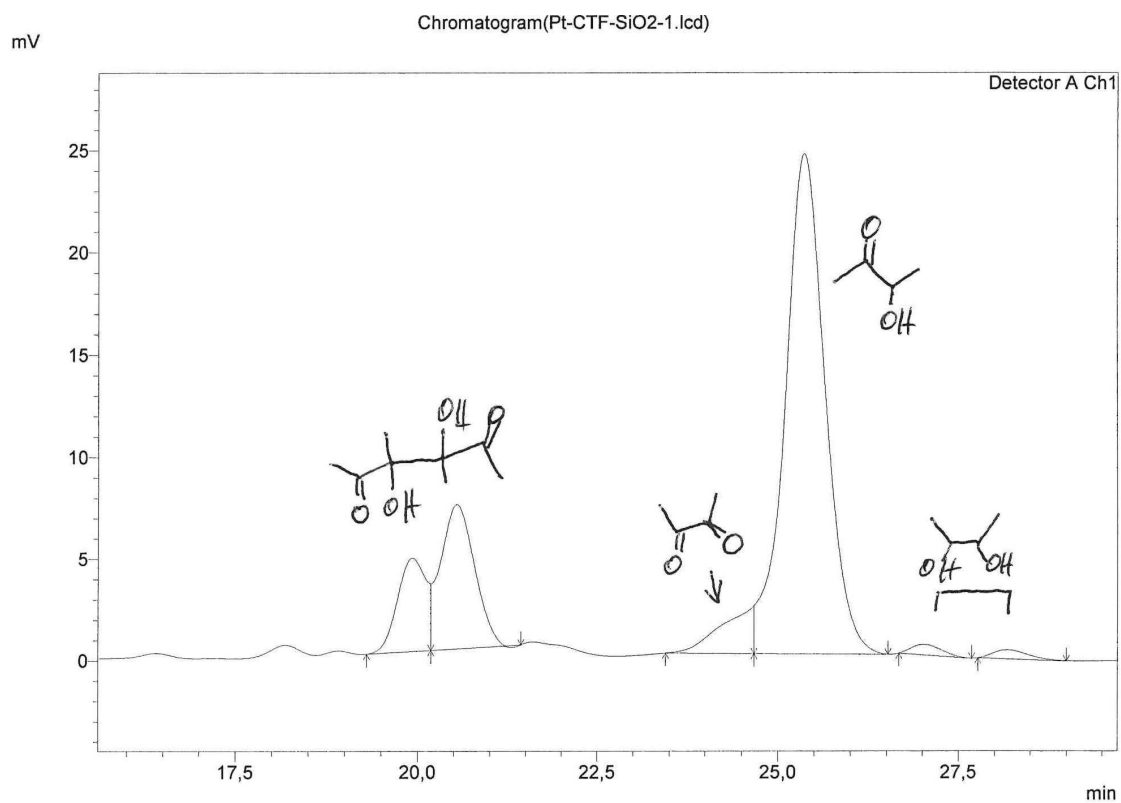

**Fig. S13.** HPLC trace for the **1**-catalyzed 2,3-BDO hydrogenation carried out at 85 °C for 3 h.

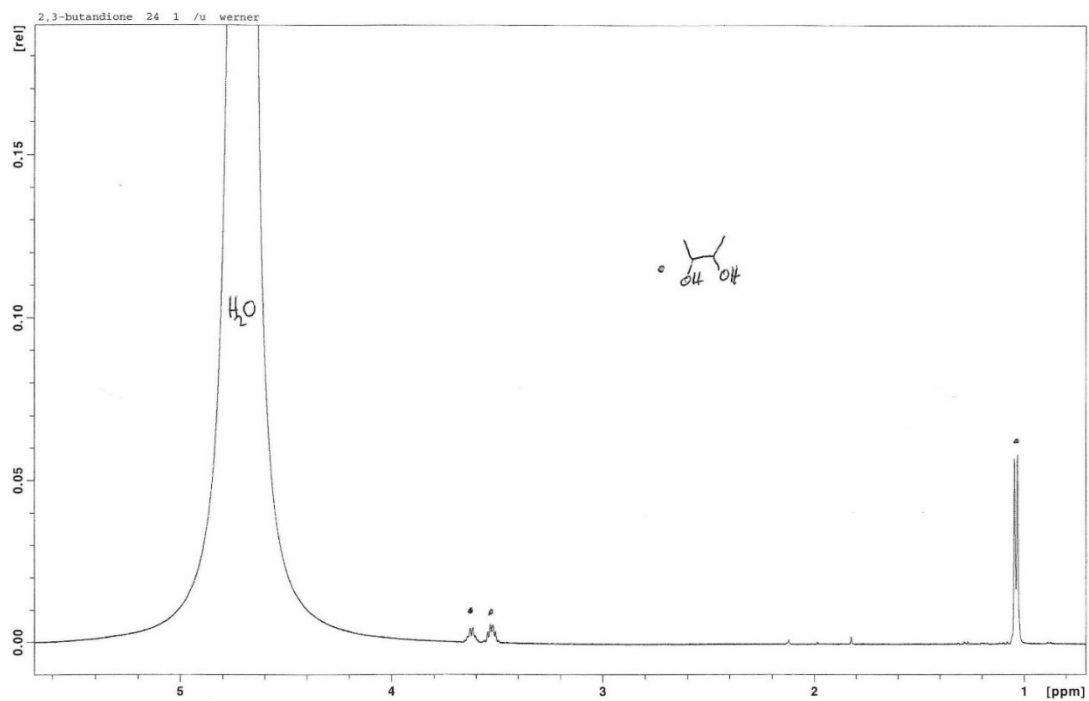

**Fig. S14.**  $^1\text{H}$  NMR acquired with an Evans tube ( $\text{D}_2\text{O}$ ) for the **1**-catalyzed 2,3-BDO hydrogenation carried out at 105 °C for 15 h.

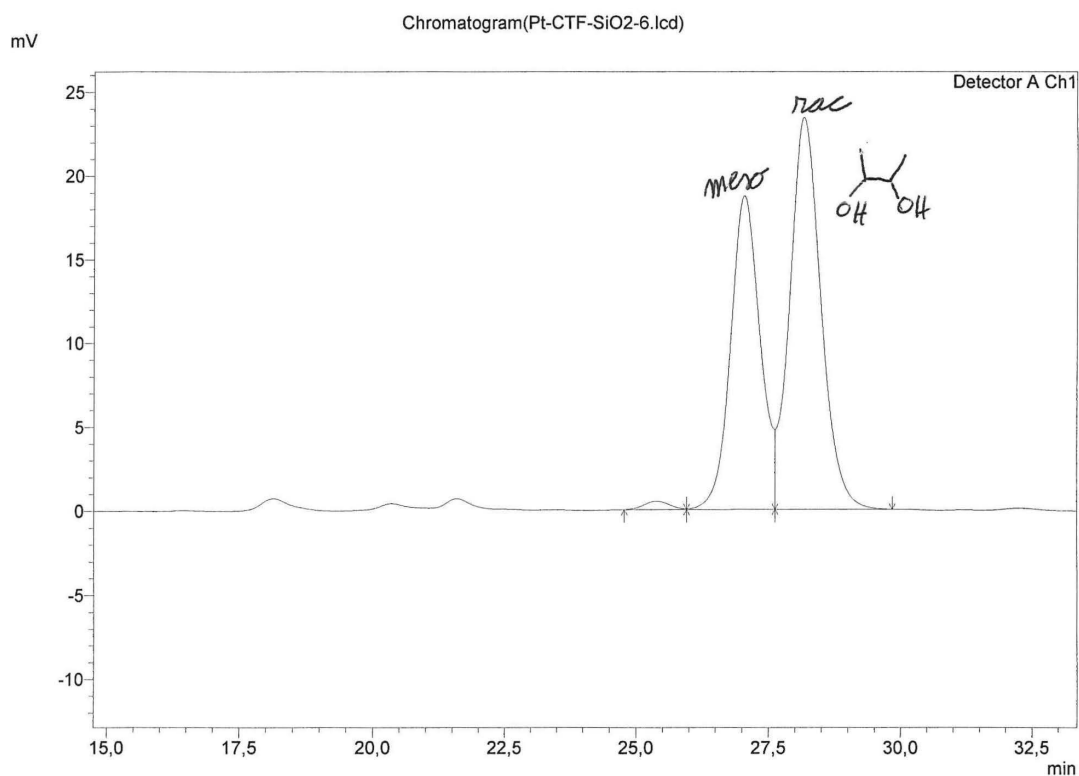

**Fig. S15.** HPLC trace for the **1**-catalyzed 2,3-BDO hydrogenation carried out at 105 °C for 15 h.

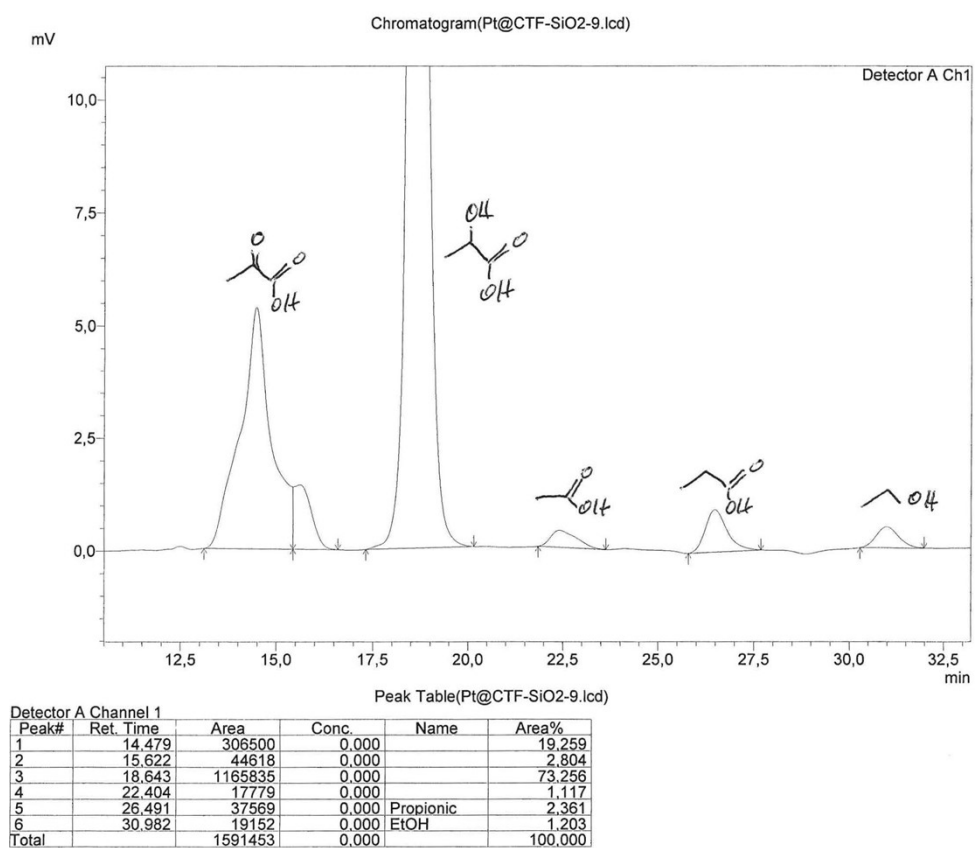

**Fig. S16.** HPLC trace for the **1**-catalyzed pyruvic acid hydrogenation at 105 °C for 1 h.



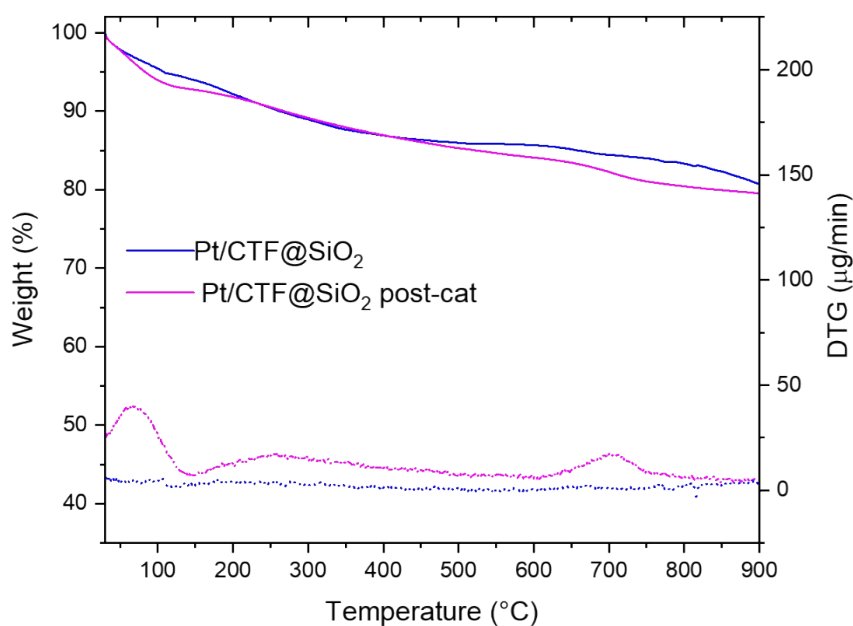

**Fig. S18.** TGA analysis under a nitrogen atmosphere (200 mL/min) from 30°C to 900°C at a heating rate of 10°C/min of as-synthesized **1** (blue) and recovered **1** after four catalytic cycles (violet), Table 1 entry 15.

### 3. Tables

**Table S1.** Binding energies (B.E.) for Si2p<sub>3/2</sub>, N1s and Pt4f<sub>7/2</sub> given in eV.

| Sample               | B.E. Si2p <sub>3/2</sub> (eV) | B.E. N1s (eV)       | B.E. Pt4f <sub>7/2</sub> (eV)               |
|----------------------|-------------------------------|---------------------|---------------------------------------------|
| CTF@SiO <sub>2</sub> | 103.7                         | 399.0, 400.6, 402.5 | -                                           |
| <b>1</b>             | 103.9                         | 399.1, 400.6, 402.5 | 71.1 [Pt(0), 16.7%]<br>72.3 [Pt(II), 83.3%] |
| <b>2</b>             | 103.7                         | -                   | 71.0 [Pt(0), 31.5%]<br>72.3 [Pt(II), 68.5%] |

**Table S2.** Specific Surface Area (SSA) for SiO<sub>2</sub> and CTF@SiO<sub>2</sub>.

| Sample               | SSA(m <sup>2</sup> /g) |
|----------------------|------------------------|
| SiO <sub>2</sub>     | 16                     |
| CTF@SiO <sub>2</sub> | 33                     |

### 4. Scheme

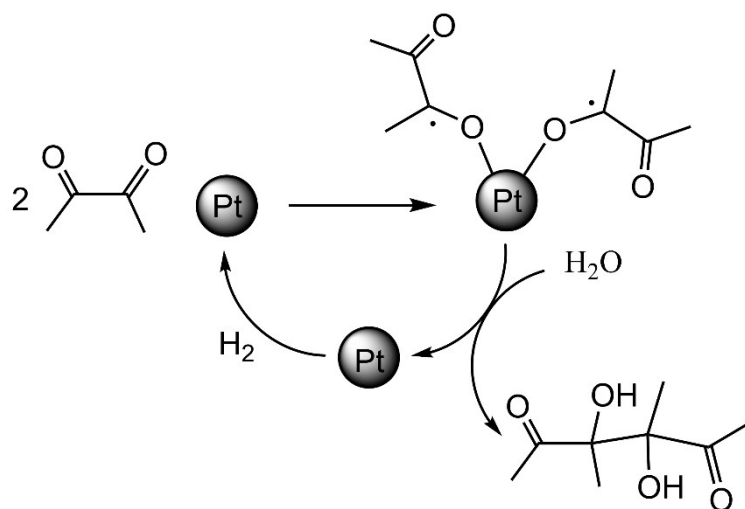

**Scheme S1.** Proposed catalytic cycle for the Pt-NP-catalyzed reductive coupling of 2,3-BDO in the presence of hydrogen and water.
